# Supplementary material for: Near infra-red luminescent osmium labelled gold nanoparticles for cellular imaging and singlet oxygen generation
Source: Royal Society of Chemistry journal article supplement (doi:10.1039/d4nr01901f), 2024-01-01
Supplement: d4nr01901f1.pdf [file d4nr01901f1.pdf]

## Supporting information

### Near Infra-Red Luminescent Osmium Labelled Gold Nanoparticles for Cellular Imaging and Singlet Oxygen Generation

Luke S. Watson,<sup>a</sup> Joseph Hughes,<sup>a</sup> Salma T. Rafik,<sup>b, c</sup> Asier R. Muguruza,<sup>a</sup> Patricia M. Girio,<sup>a, e</sup> Sarah O. Akponasa,<sup>a, d</sup> Garret Rochford,<sup>d</sup> Alexander J. MacRobert,<sup>b</sup> Nikolas J. Hodges,<sup>d</sup> Elnaz Yaghini<sup>b</sup> and Zoe Pikramenou<sup>a</sup>

<sup>a</sup> School of Chemistry, <sup>e</sup> Doctoral Training Centre in Physical Sciences for Health, University of Birmingham, Edgbaston, B15 2TT, United Kingdom.

<sup>b</sup> Dept. of Surgical Biotechnology, Faculty of Medical Sciences, University College London, London, United Kingdom.

<sup>c</sup> Department of Clinical Pharmacology, Faculty of Medicine, Alexandria University, Alexandria 21516, Egypt.

<sup>d</sup> School of Biosciences, University of Birmingham, Edgbaston, B15 2TT, United Kingdom.

\*Corresponding author: [z.pikramenou@bham.ac.uk](mailto:z.pikramenou@bham.ac.uk)

#### This file includes:

|                                                                            | Page number |
|----------------------------------------------------------------------------|-------------|
| Table of Contents                                                          |             |
| BpySS Characterisation                                                     | S 2         |
| Os(phen) <sub>2</sub> Cl <sub>2</sub> Characterisation                     | S 4         |
| OsPhenSS Characterisation                                                  | S 5         |
| Photophysical Characterisation of OsPhenSS in presence of fluorosurfactant | S10         |
| Data summary of gold nanoparticles' characterisation data                  | S11         |
| Photophysical characterisation of OsPhenSS gold nanoparticles              | S13         |
| Cell viability assays of OsPhenSS gold nanoparticles in live A549 cells    | S13         |
| Additional confocal images of z-stacks of <b>OsPhenSS•AuNP25</b>           | S15         |
| Calculation of number ( <i>N</i> ) of gold atoms per nanoparticle          | S17         |

## BpySS Characterisation

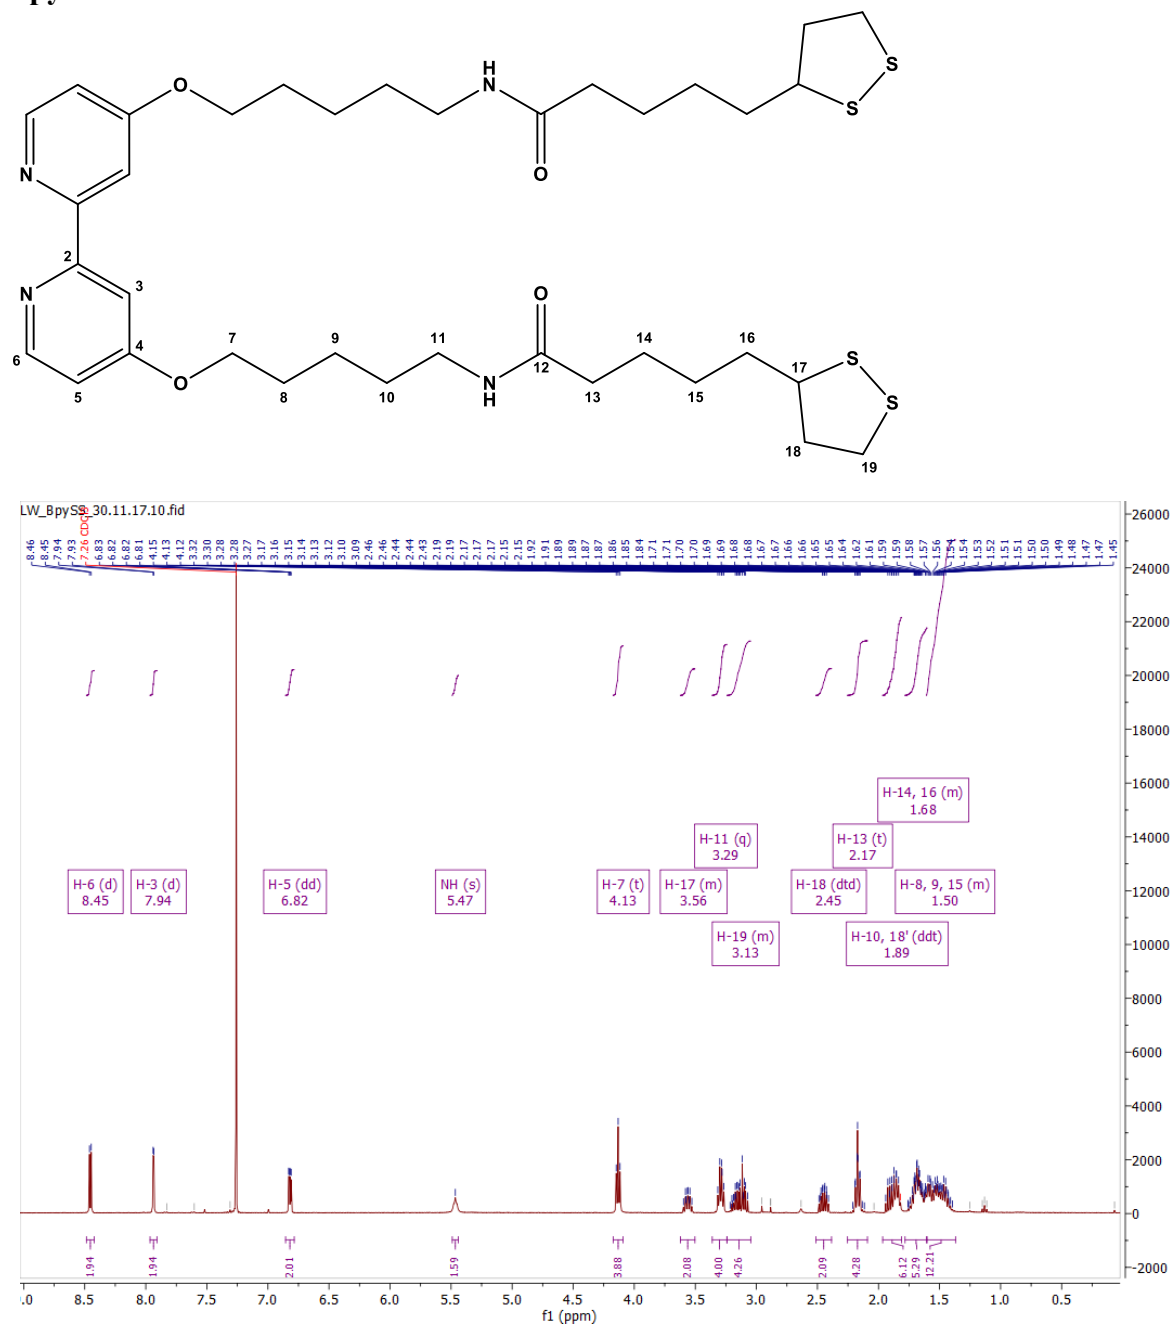Figure S1.  $^1\text{H}$  NMR spectrum of BpySS in  $\text{CDCl}_3$ .

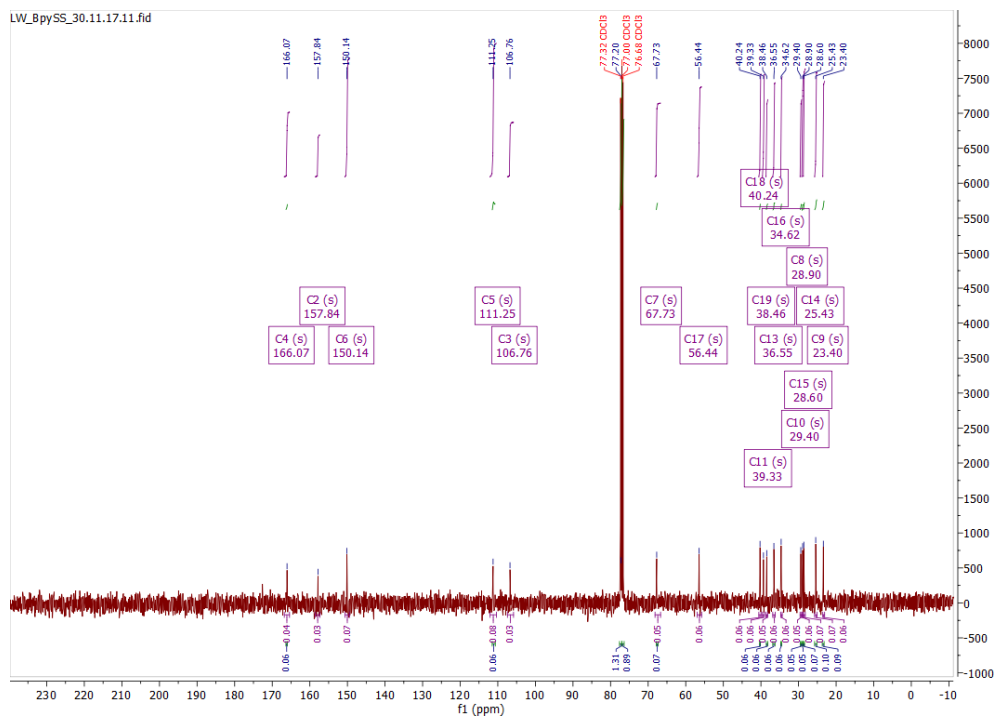

Figure S2. <sup>13</sup>C NMR spectrum of BpySS in CDCl<sub>3</sub>.

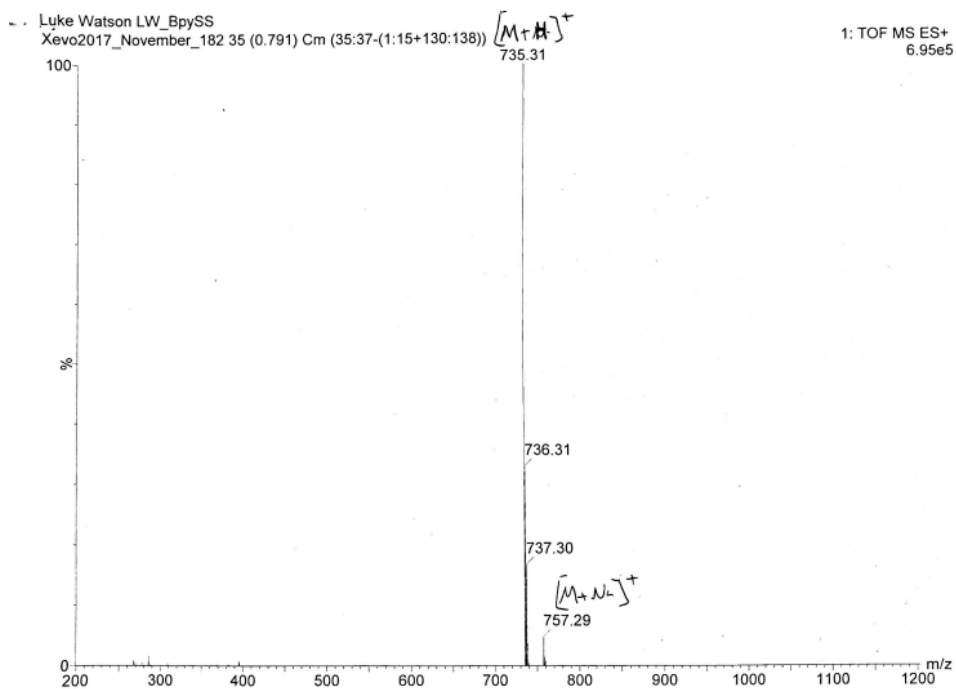

Figure S3. ESI (+) mass spectrum of BpySS.

## Os(phen)<sub>2</sub>Cl<sub>2</sub> Characterisation

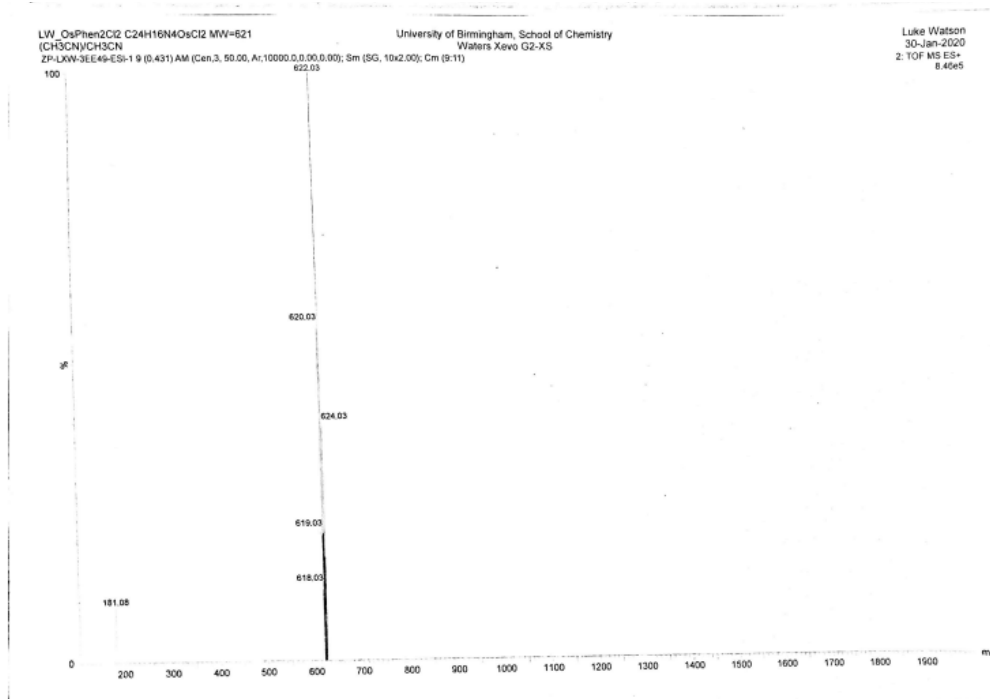

Figure S4. ESI(+) mass spectrum of Os(Phen)<sub>2</sub>Cl<sub>2</sub>.

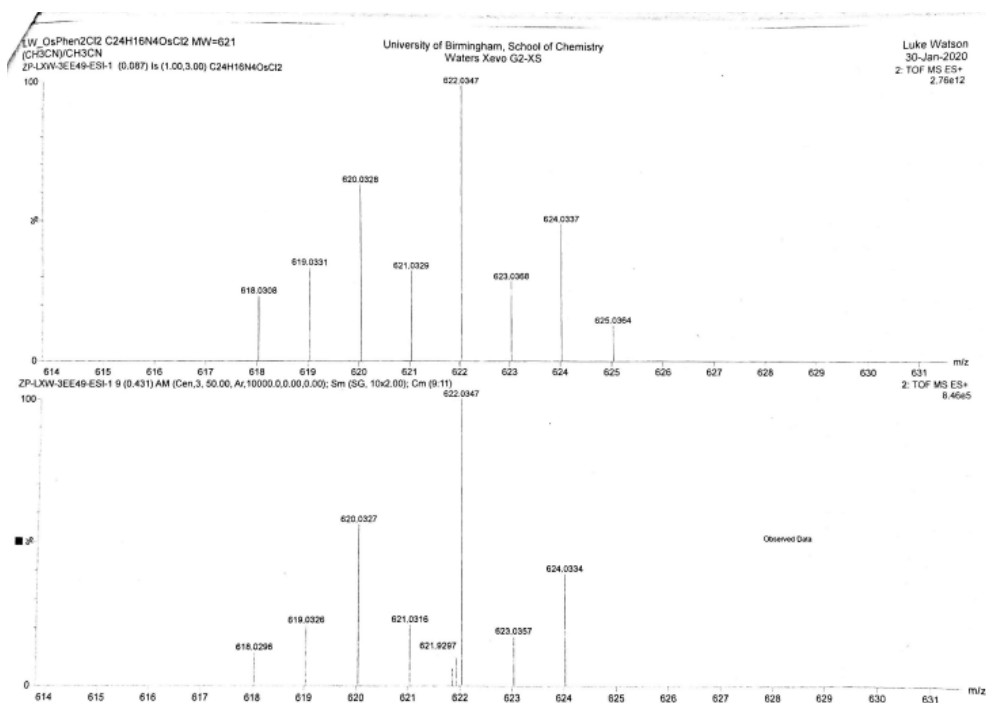

Figure S5. ESI (+) mass spectrum of Os(Phen)<sub>2</sub>Cl<sub>2</sub> of experimental mass vs theoretical mass.

## OsPhenSS Characterisation

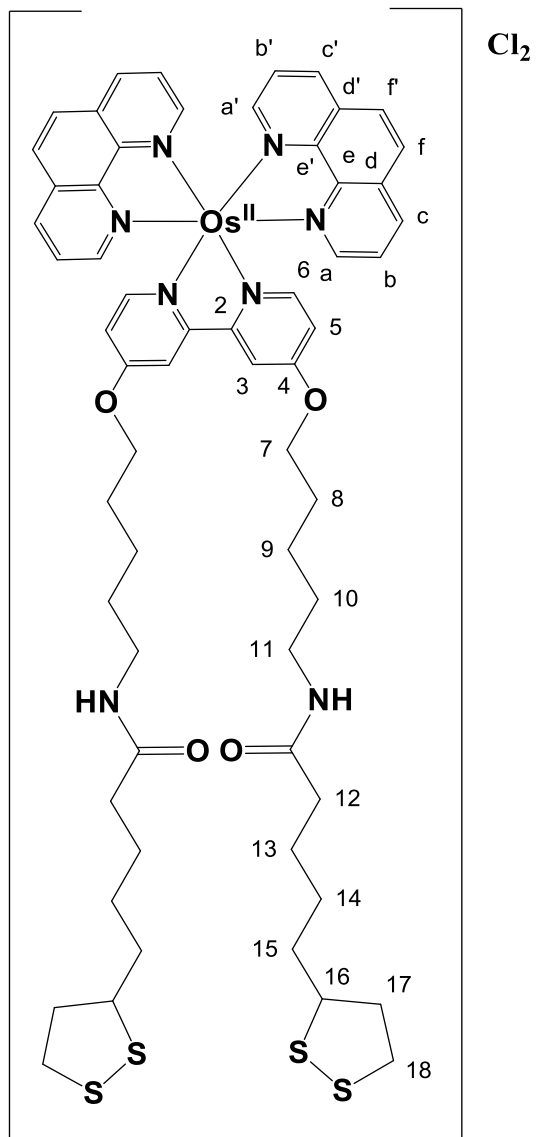

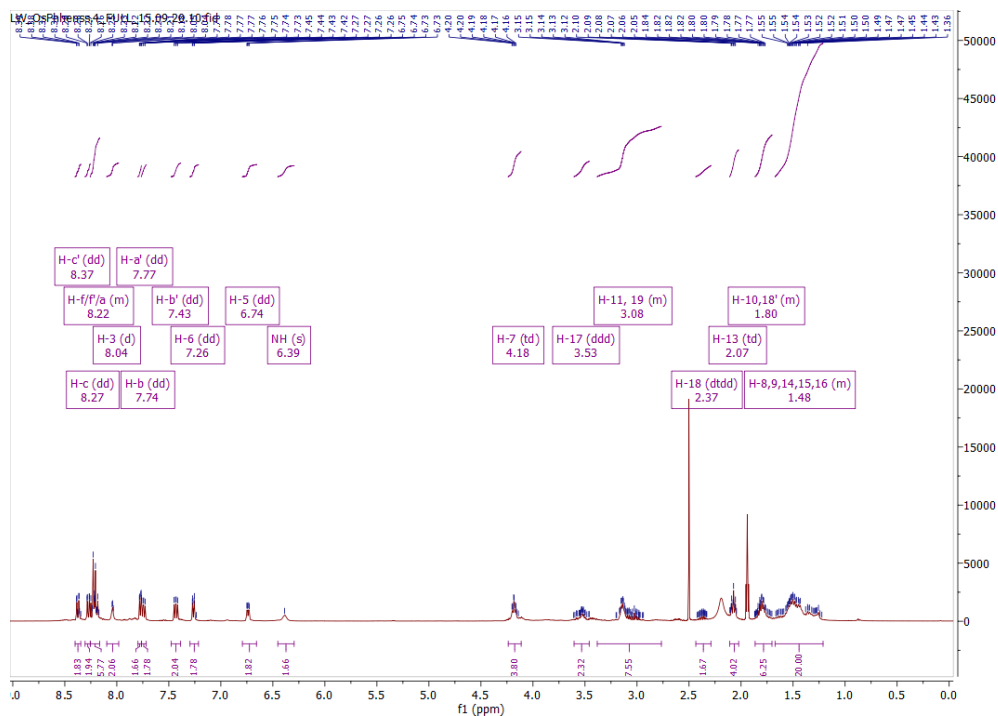

Figure S6.  $^1\text{H}$  NMR spectrum of OsPhenSS in  $\text{CD}_3\text{CN}$ .

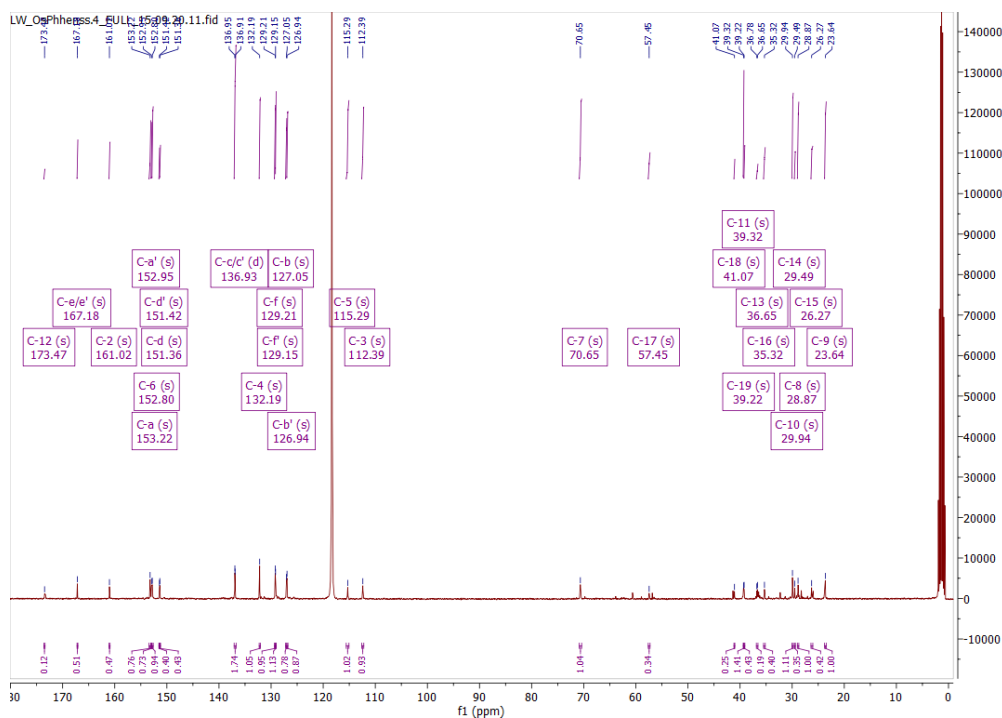

Figure S7.  $^{13}\text{C}$  NMR spectrum of OsPhenSS in  $\text{CD}_3\text{CN}$ .

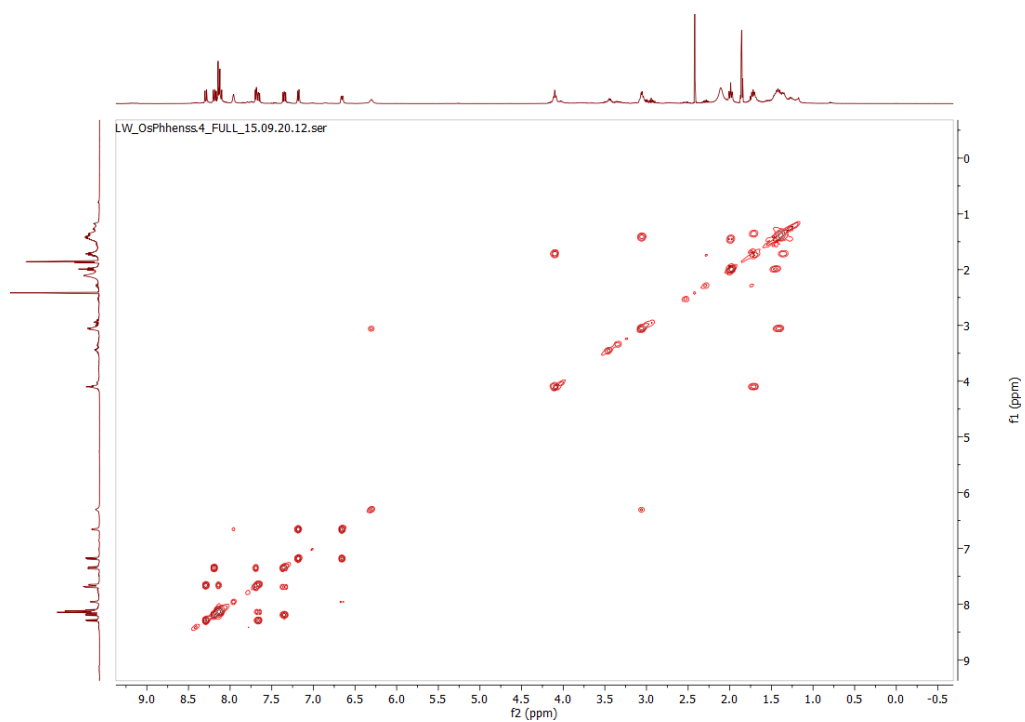

**Figure S8.** COSY spectrum of OsPhenSS in CD<sub>3</sub>CN.

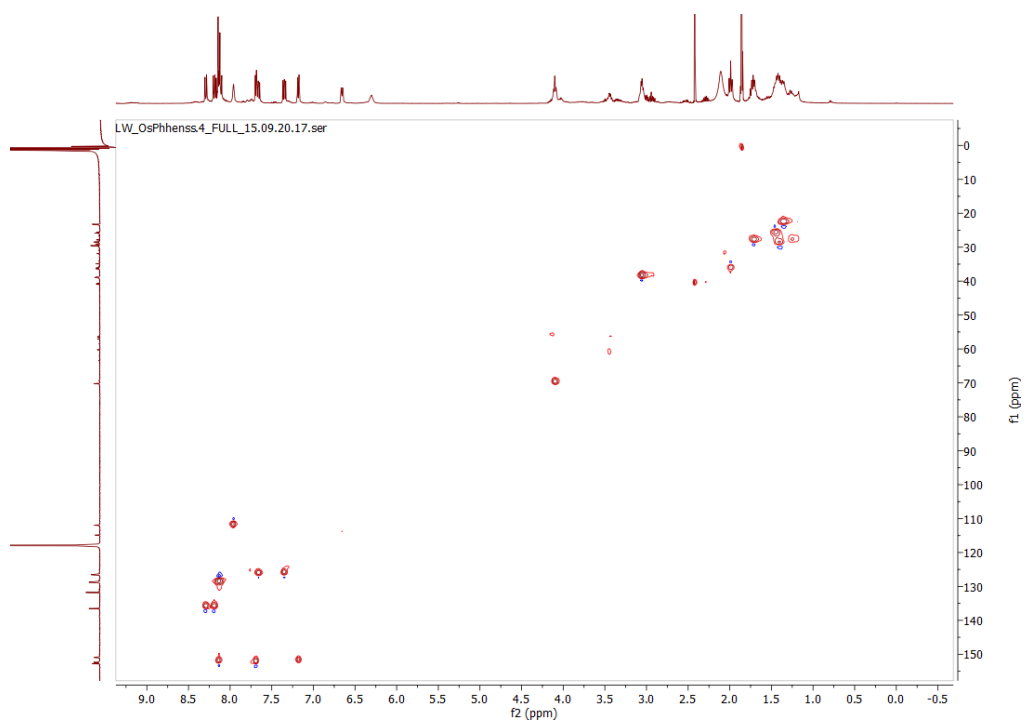

**Figure S9.** HSQC spectrum of OsPhenSS in CD<sub>3</sub>CN.

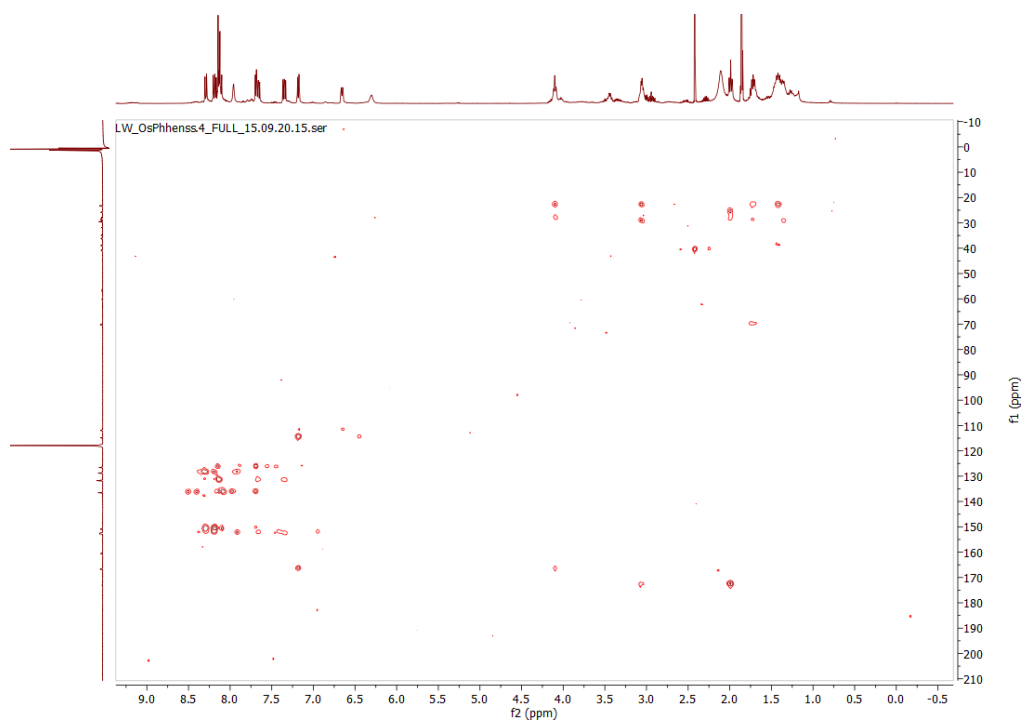

Figure S10. HMBC spectrum of OsPhenSS in CD<sub>3</sub>CN.

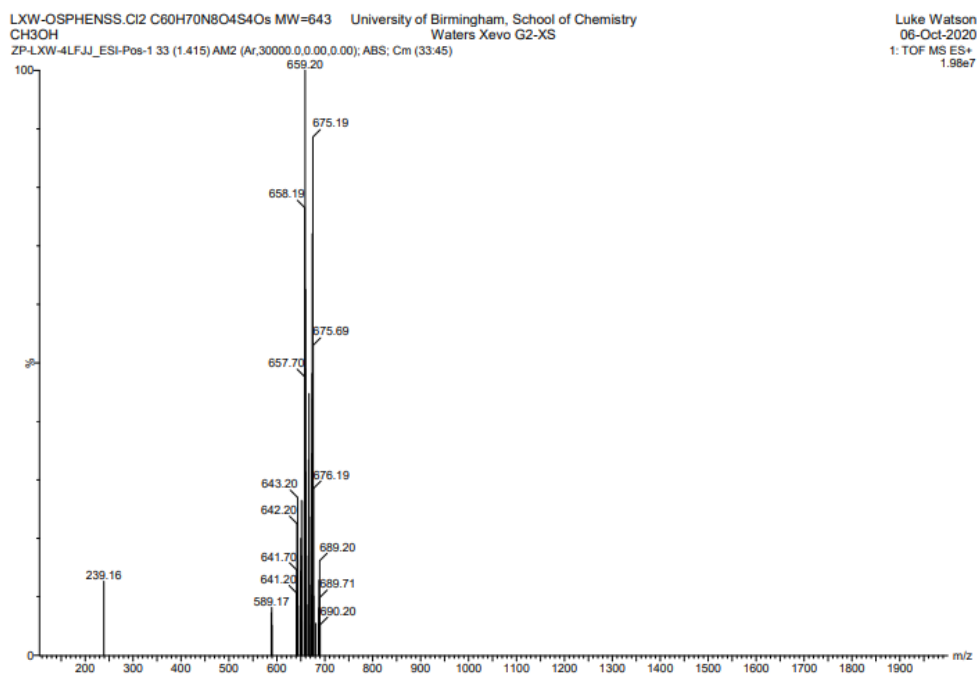

Figure S11. ESI (+) mass spectrum of OsPhenSS.



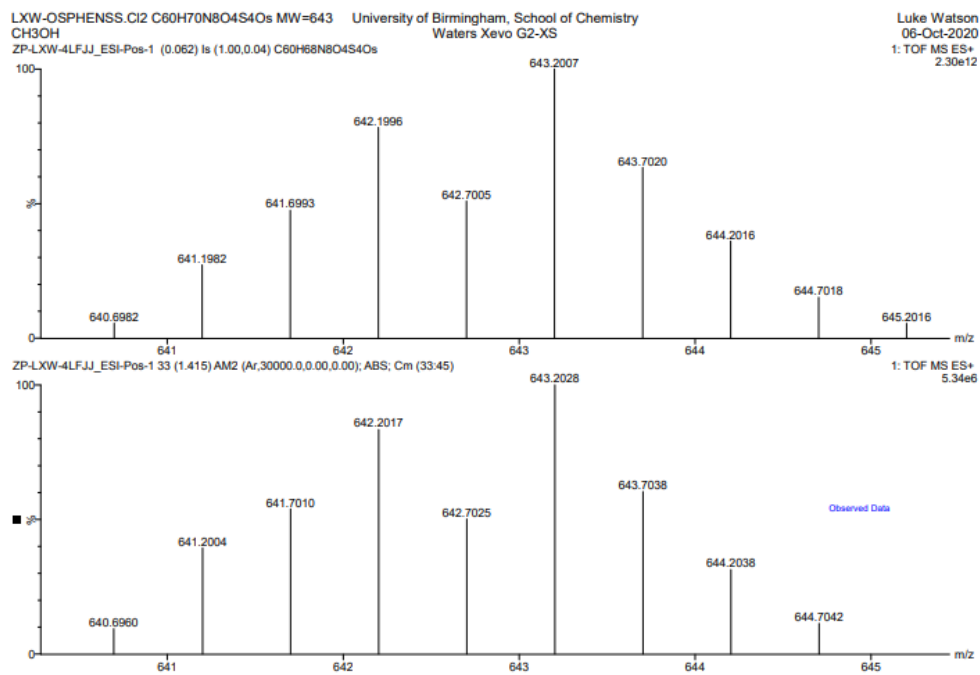

**Figure S12.** ESI (+) mass spectrum of OsPhenSS. Theoretical mass vs experimental exact mass.

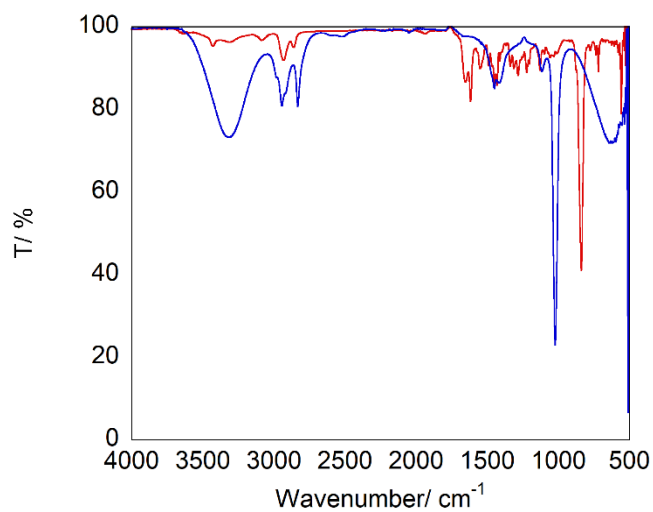

**Figure S13.** FTIR spectrum of OsPhenSS as the PF<sub>6</sub> counter ion (red) and the Cl counter ion (blue) showing successful ion exchange.

**Photophysical Characterisation of OsPhenSS in presence of fluorosurfactant**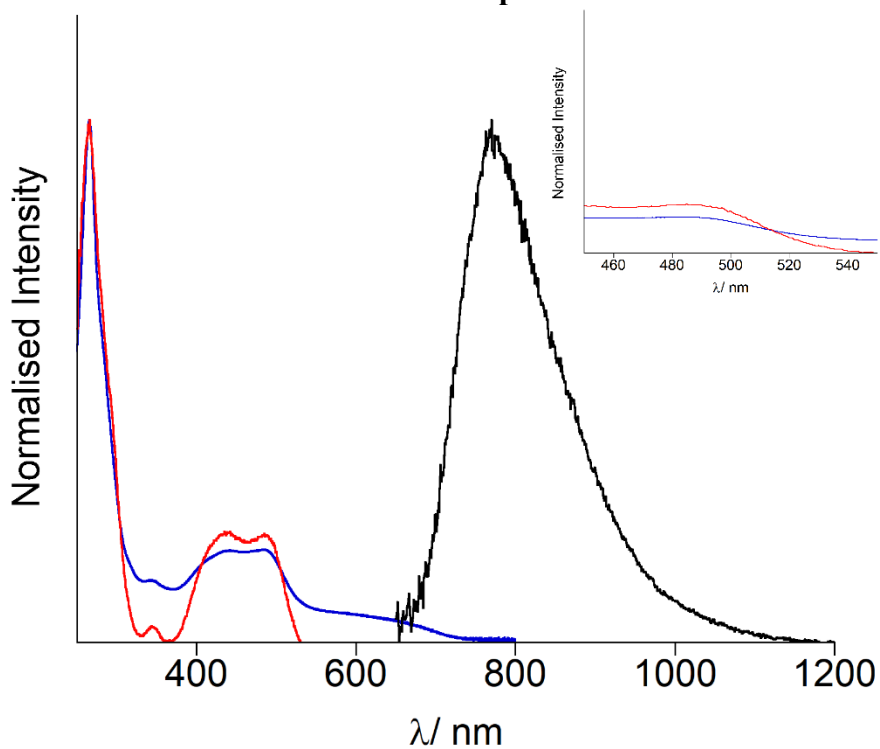

**Figure S14.** Normalised emission (black), excitation (red) and UV Vis (blue) of 10 μM **OsPhenSS** in the presence of 485 μM Zonyl FSA in 1mL aerated water ( $\lambda_{\text{ex}} = 485\text{nm}$ ,  $\lambda_{\text{em}} = 770\text{nm}$ ). Insert is magnification of excitation spectra 450 – 550 nm showing tail off.

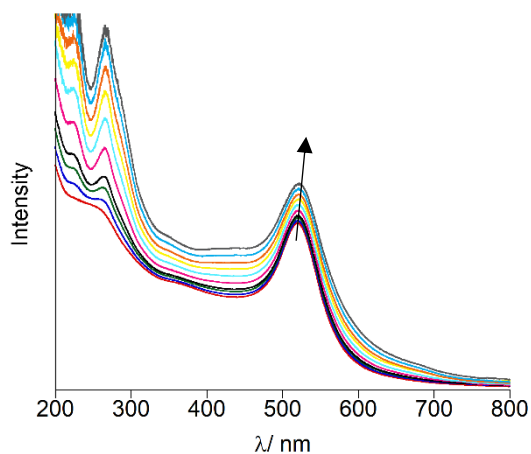

**Figure S15.** UV-Vis titration of 5 μL quantities of 1 mM **OsPhenSS** into 2 nM **Z•AuNP25** in water (35 μL added).

### Data summary of gold nanoparticles' characterisation data

(A)

|                        | $\lambda_{\max}$ / nm | Shift / nm |
|------------------------|-----------------------|------------|
| <b>AuNP13</b>          | 517                   | 0          |
| <b>Z•AuNP13</b>        | 518                   | 1          |
| <b>OsPhenSS•AuNP13</b> | 521                   | 4          |
| <b>AuNP25</b>          | 518                   | 0          |
| <b>Z•AuNP25</b>        | 519                   | 1          |
| <b>OsPhenSS•AuNP25</b> | 524                   | 6          |

(B)

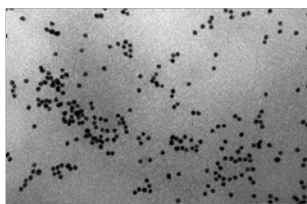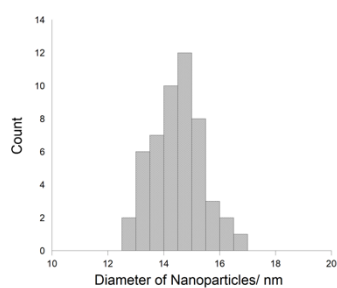

(C)

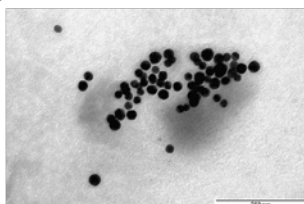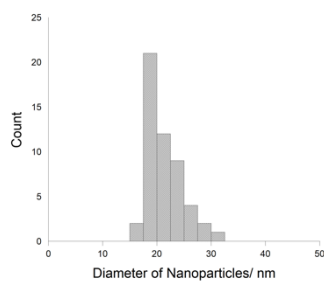

**Figure S16.** (A) Summary of UV-Vis shifts of gold nanoparticle samples; TEM images of (B) OsPhenSS•AuNP13 and (C) OsPhenSS•AuNP25 and associated histogram plots (n = 50). Scale bar = 200 nm.

(A)

|                                          | Number/ nm | Volume/ nm | PDI   | Zeta potential / mV |
|------------------------------------------|------------|------------|-------|---------------------|
| <b>AuNP13</b>                            | 14 ± 3     | 17 ± 4     | 0.06  | -35 ± 4             |
| <b>Z•AuNP13</b>                          | 20 ± 5     | 23 ± 5     | 0.12  | -49 ± 5             |
| <b>OsPhen•AuNP13</b>                     | 18 ± 5     | 31 ± 14    | 0.27  | -39 ± 8             |
| <b>AuNP25</b>                            | 21 ± 5     | 25 ± 7     | 0.07  | -34 ± 4             |
| <b>Z•AuNP25</b>                          | 29 ± 8     | 34 ± 13    | 0.26  | -42 ± 4             |
| <b>OsPhen•AuNP25</b>                     | 27 ± 8     | 40 ± 25    | 0.32  | -36 ± 3             |
| <b>AuNP13 in D<sub>2</sub>O</b>          | 13 ± 3     | 16 ± 6     | 0.095 | -32 ± 8             |
| <b>Z•AuNP13 in D<sub>2</sub>O</b>        | 21 ± 6     | 27 ± 10    | 0.271 | -76 ± 12            |
| <b>OsPhenSS•AuNP13 in D<sub>2</sub>O</b> | 22 ± 6     | 28 ± 11    | 0.265 | -36 ± 8             |

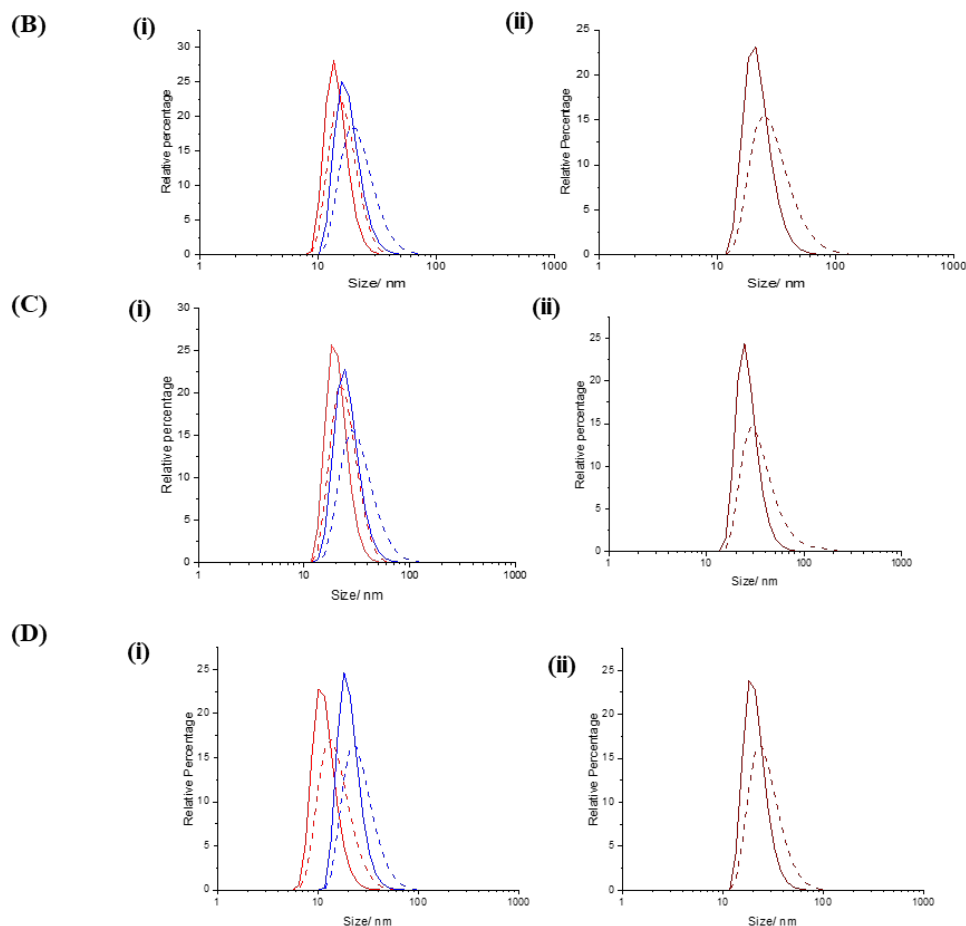

**Figure S17.** (A) Summary of Dynamic Light Scattering (DLS) data of gold nanoparticle samples ( $n = 5$  for size and  $n = 3$  for  $\zeta$ -potential); (B) Number (solid line) an Volume (dashed line) size distributions for (i) citrate-capped **AuNP13** (red) and **Z•AuNP13** (blue) and (ii) **OsPhen•AuNP13** (brown); (C) Number (solid line) an Volume (dashed line) size distributions for (i) citrate-capped **AuNP25** (red) and **Z•AuNP25** (blue) and (ii) **OsPhen•AuNP25** (brown); (D) Number (solid line) an Volume (dashed line) size distributions for (i) citrate-capped **AuNP13** in D<sub>2</sub>O (red) and **Z•AuNP13** in D<sub>2</sub>O (blue) and (ii) **OsPhen•AuNP13** in D<sub>2</sub>O (brown).

### Photophysical characterisation of OsPhenSS•AuNP25

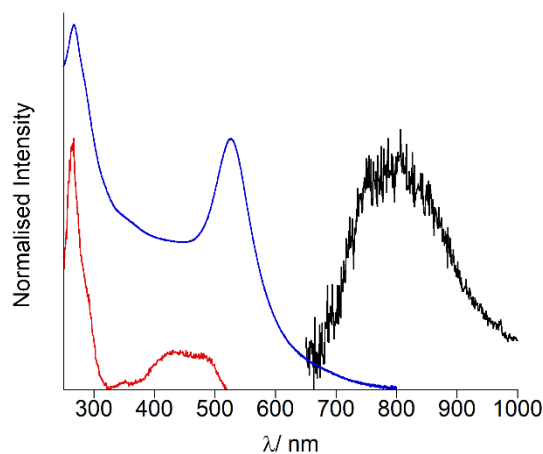

**Figure S18.** Normalised emission (black,  $\lambda_{exc} = 485$  nm), excitation (red,  $\lambda_{em} = 785$  nm) and UV-Vis (blue) spectra of **OsPhenSS•AuNP25** (2 nM) in aerated water.

### Cell viability assays of OsPhenSS•AuNP in live A549 cells

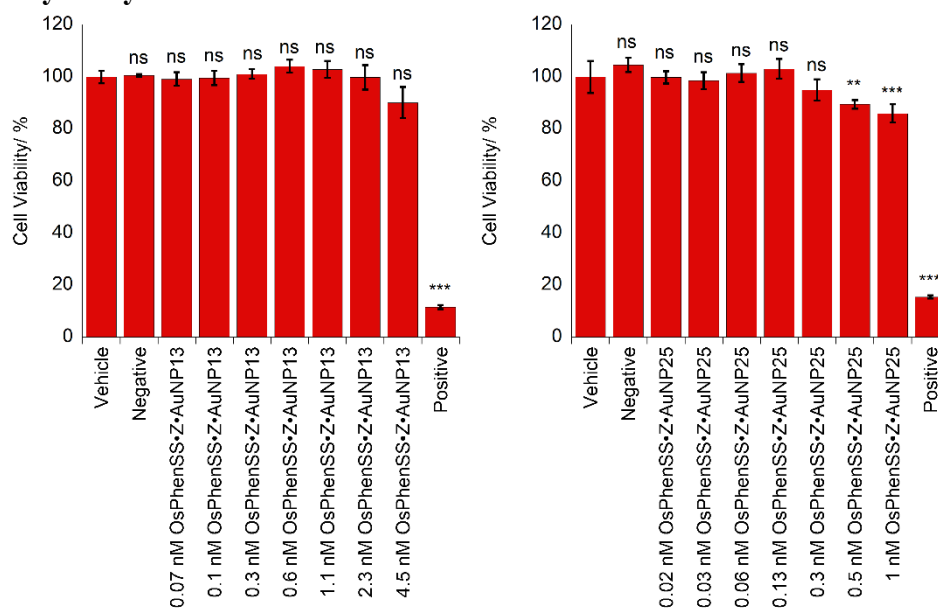

**Figure S19.** MTT assays of A549 cells treated with serial particle dilutions of (a) **OsPhenSS•AuNP13** and (b) **OsPhenSS•AuNP25** for 24 hours at 37°C 1-way ANOVA followed by a Dunnett's t-test corrected for multiple comparisons. \*= $P < 0.05$ , \*\*= $P < 0.01$ , \*\*\*= $P < 0.001$ ,  $n = 3$ .

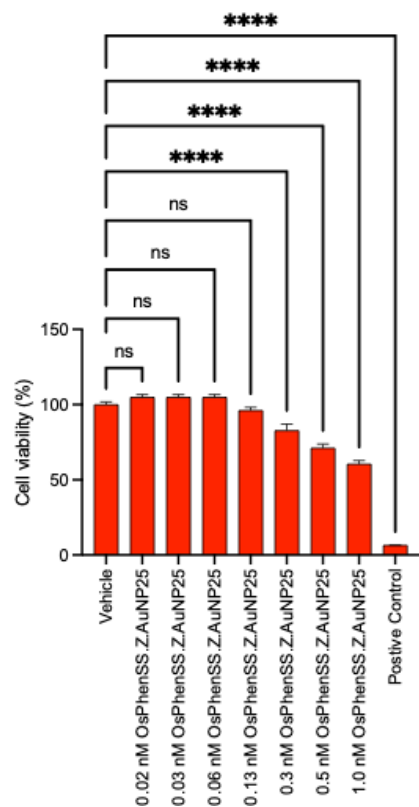

**Figure S20.** MTT cytotoxicity assay of MRC5 cells (embryonic human lung fibroblasts) treated with **OsPhenSS•AuNP25** for 24 h. Data is plotted as percentage control relative to vehicle alone. As a positive control cells were treated with 0.1% w/v Triton-X-100 for 24 h. The results represent the mean  $\pm$  SEM of six technical replicates. \*\*\*\*, statistically significant from vehicle control as assessed by a one-way ANOVA followed by a Dunnett's post-hoc t-test corrected for multiple comparisons,  $P < 0.0001$ .

### Additional Confocal microscopy images of OsPhenSS•AuNP25

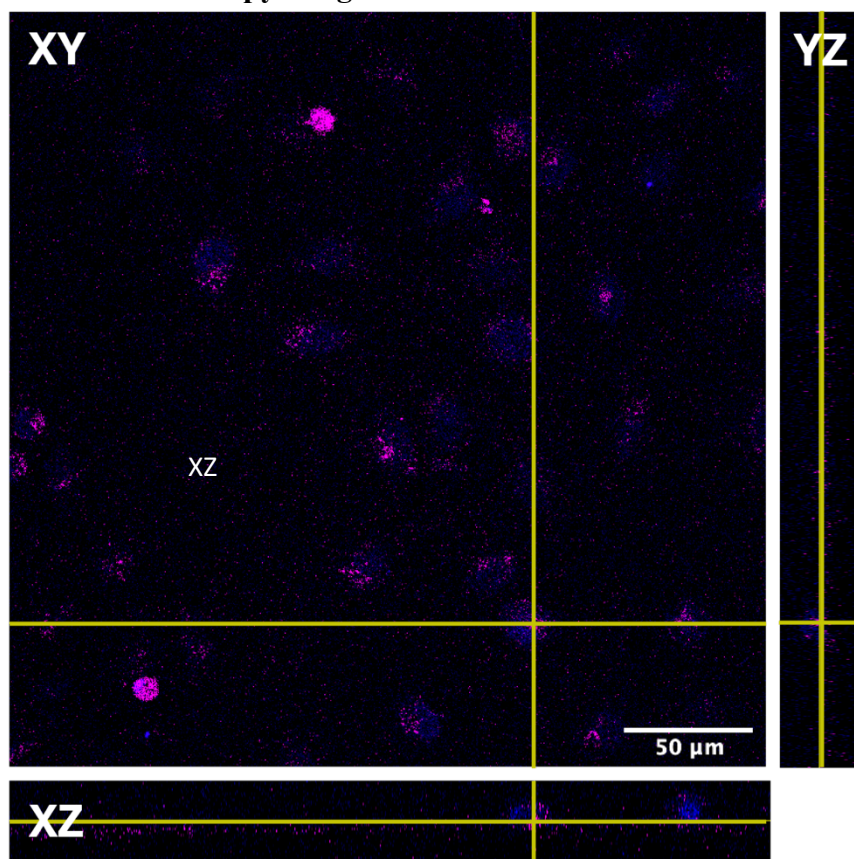

**Figure S21.** Orthogonal reconstruction of selected central plane from z-stack images of A549 cells showing osmium signal inside cells after incubation with 0.2 nM OsPhenSS•AuNP25 for 18 h at 37°C. Purple channel, osmium emission ( $\lambda_{\text{exc}} = 488 \text{ nm}$ ,  $\lambda_{\text{em}} = 650 - 800 \text{ nm}$ ); blue channel, Hoescht 3368 nuclear staining ( $\lambda_{\text{exc}} = 402 \text{ nm}$ ,  $\lambda_{\text{em}} 420-470 \text{ nm}$ ).

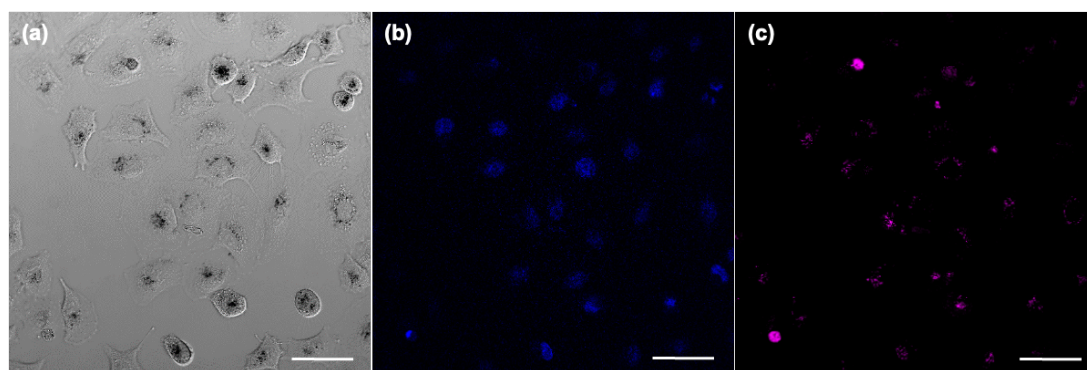

**Figure S22.** Separate channels (Figure 5) in the live cell images of A549 cells incubated with OsPhenSS•AuNP25 (0.2 nM, incubation for 18 h). (a) brightfield, (b) blue channel, Hoescht 3368 nuclear staining ( $\lambda_{\text{exc}} = 405 \text{ nm}$ ,  $\lambda_{\text{em}} = 420 - 470 \text{ nm}$ ), (c) purple channel, osmium-based emission ( $\lambda_{\text{exc}} = 488 \text{ nm}$ ,  $\lambda_{\text{em}} = 650-800 \text{ nm}$ ). Scale bar is 50  $\mu\text{m}$ .



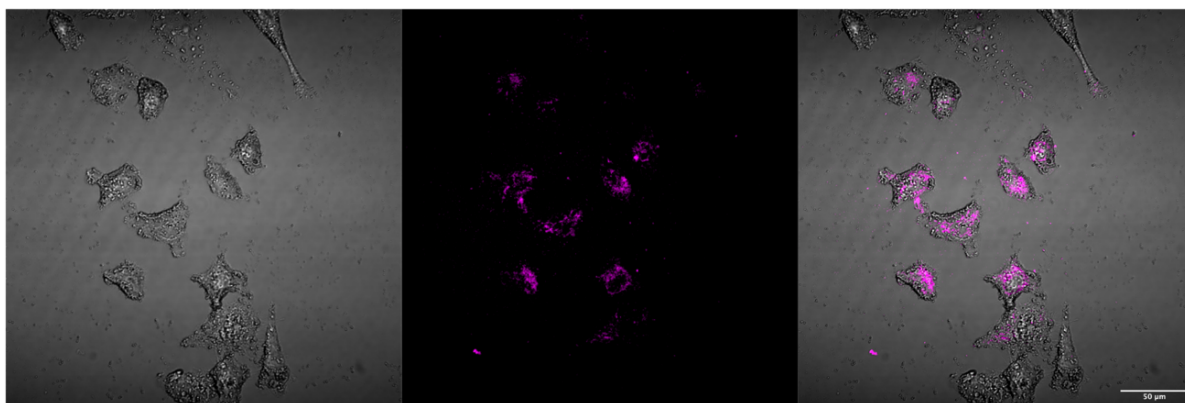

**Figure S23.** Confocal microscopy of **OsPhenSS•AuNP25** in fixed A549 cells (0.2 nM **OsPhenSS•AuNP25** at 4 h). Brightfield (left); Purple channel, **OsPhenSS•AuNP25** emission ( $\lambda_{exc} = 488$  nm,  $\lambda_{em} = 650-800$  nm) (middle) and overlap of brightfield and osmium emission (right). Scale bar is 50  $\mu$ m.

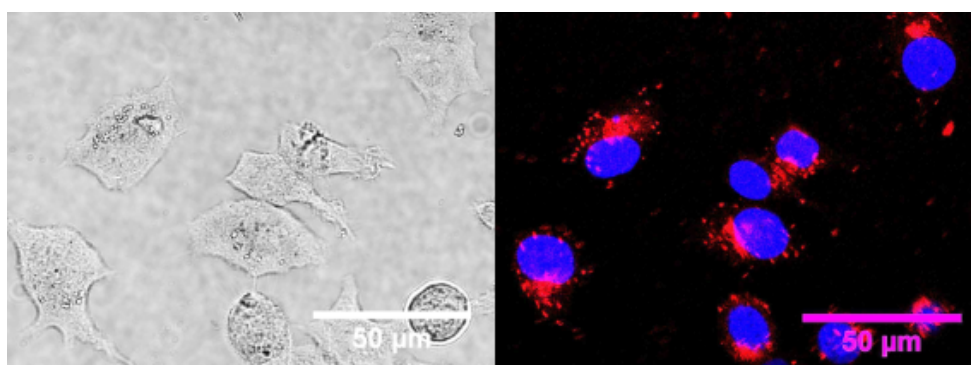

**Figure S24.** Dual channel fluorescence image of MCF-7 cells with corresponding brightfield image incubated with **OsPhenSS•AuNP25** at 0.1 nM incubated for 24 h (red channel,  $\lambda_{exc} = 552$  nm,  $\lambda_{em} = 680-710$  nm) and Nuclear Violet (Cambridge Bioscience, UK) incubated for 1 h at 10 $\mu$ M prior to imaging (blue channel,  $\lambda_{exc} = 405$  nm,  $\lambda_{em} = 430-470$  nm) to stain the nucleus. The luminescence shows punctate intracellular and perinuclear distribution. Scale bar is 50  $\mu$ m.

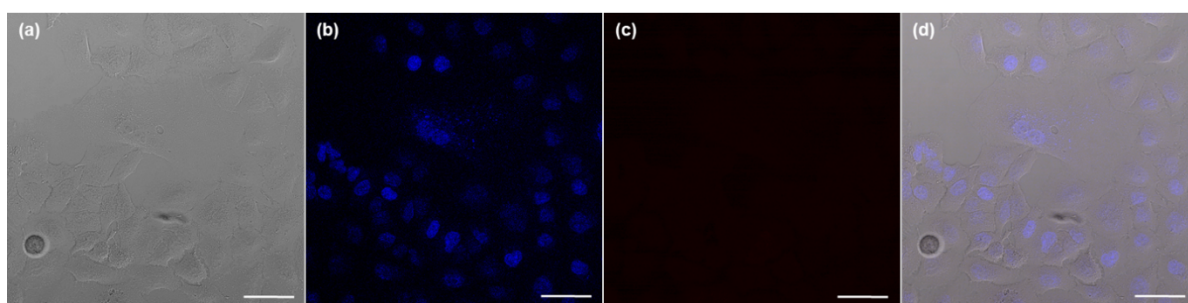

**Figure S25.** Confocal image of untreated control A549 cells. (a) Brightfield, (b) blue channel, Hoechst 3368 nuclear staining ( $\lambda_{exc} = 405$  nm,  $\lambda_{em} = 420 - 470$  nm), (c) purple channel, osmium ( $\lambda_{exc} = 488$  nm,  $\lambda_{em} = 650 - 800$  nm) and (d) overlap of brightfield, blue channel (Hoechst 3368) and purple channel (osmium). Scale bar is 50  $\mu$ m.



**Calculation of number ( $N$ ) of gold atoms per nanoparticle**

Assuming the gold nanoparticles are perfect spheres and atoms are packed in a uniform face-centred cubic crystalline structure, and taking the density of gold as  $\rho_{\text{gold}} = 19.32 \text{ g cm}^{-3}$

$$N = \frac{\rho \times \pi D^3}{6 \times M_r} \times N_A$$

Where  $M_r$  of gold =  $196.96657 \text{ g mol}^{-1}$ , Avogadro's constant  $N_A = 6.022140857 \times 10^{23} \text{ mol}^{-1}$

The equation simplifies:

$$N = 30.8969 \times D^3$$

---
